# Supplementary material for: Osteogenic potential of a 3D printed silver nanoparticle-based electroactive scaffold for bone tissue engineering using human Wharton's jelly mesenchymal stem cells
Source: Royal Society of Chemistry journal article supplement (doi:10.1039/d3ma00332a), 2023-01-01
Supplement: d3ma00332a1.pdf [file d3ma00332a1.pdf]

## Supplementary information

### **Osteogenesis Study of 3D Printed of Silver Nanoparticles-based Electroactive and Anti-infection Scaffold Using Human Wharton's Jelly Mesenchymal Stem Cells**

**Mira Mira<sup>a</sup>, Arie Wibowo<sup>\*b,c</sup>, Gusti Umindya Nur Tajalla<sup>d</sup>, Glen Cooper<sup>e</sup>, Paulo Jorge Da Silva Bartolo<sup>f</sup>, Anggraini Barlian<sup>\*c,g</sup>.**

<sup>a</sup>Master of Biotechnology, School of Life Sciences and Technology, Institut Teknologi Bandung, Bandung, West Java, Indonesia

<sup>b</sup>Material Science and Engineering Research Group, Faculty of Mechanical and Aerospace Engineering, Institut Teknologi Bandung, Bandung, West Java, Indonesia. E-mail: [ariewibowo@itb.ac.id](mailto:ariewibowo@itb.ac.id)

<sup>c</sup>Research Center for Nanoscience and Nanotechnology, Institut Teknologi Bandung, Bandung, West Java, Indonesia

<sup>d</sup>Materials and Metallurgy Engineering, Institut Teknologi Kalimantan, Balikpapan, East Kalimantan, Indonesia

<sup>e</sup>School of Engineering, University of Manchester, Manchester M13 9PL, UK

<sup>f</sup>The Singapore Centre for 3D Printing (SC3DP), Nanyang Technological University, 50 Nanyang Avenue, Block N3.1-B2C-03, Singapore 639798

<sup>g</sup>School of Life Sciences and Technology, Institut Teknologi Bandung, Bandung, West Java, Indonesia. E-mail: [aang@sith.itb.ac.id](mailto:aang@sith.itb.ac.id)

Corresponding author: [ariewibowo@itb.ac.id](mailto:ariewibowo@itb.ac.id) , [aang@sith.itb.ac.id](mailto:aang@sith.itb.ac.id)

## I. Statistical analysis of proliferation results

**Table S1.** Overall proliferation results

| Day            | 1       |       |           | 3       |       |           | 5       |       |           | 7       |       |           | 14      |       |           |
|----------------|---------|-------|-----------|---------|-------|-----------|---------|-------|-----------|---------|-------|-----------|---------|-------|-----------|
| Cell Number    | Control | PCL   | PCL/AgNPs |
| Cell Number 1  | 33798   | 46039 | 54741     | 10660   | 55587 | 51912     | 7238    | 74791 | 68948     | 6608    | 74888 | 77217     | 4284    | 88089 | 99978     |
| Cell Number 2  | 34057   | 43294 | 49470     | 7899    | 47984 | 51553     | 4791    | 67706 | 70705     | 4040    | 65466 | 78593     | 2483    | 78893 | 92221     |
| Cell Number 3  | 33139   | 42547 | 49017     | 7545    | 49263 | 51297     | 4793    | 67609 | 82169     | 4161    | 66874 | 78077     | 2572    | 79251 | 91356     |
| Cell Number 4  | 53534   | 39282 | 48240     | 7407    | 44657 | 58303     | 3987    | 51870 | 72045     | 4499    | 64351 | 77664     | 1148    | 73304 | 81255     |
| Cell Number 5  | 42690   | 39928 | 48345     | 7746    | 43614 | 61029     | 4403    | 55083 | 73258     | 4469    | 64576 | 58094     | 1382    | 79210 | 82652     |
| Cell Number 6  | 42838   | 40152 | 48281     | 7740    | 45506 | 59805     | 4456    | 55110 | 71567     | 4484    | 65628 | 72906     | 1351    | 78962 | 83126     |
| <b>Average</b> | 40009   | 41874 | 49682     | 8166    | 47769 | 55650     | 4945    | 62028 | 73115     | 4710    | 66964 | 73759     | 2203    | 79618 | 88431     |
| <b>StDev</b>   | 7991    | 2580  | 2526      | 1234    | 4370  | 4537      | 1163    | 9225  | 4663      | 949     | 3984  | 7942      | 1188    | 4751  | 7339      |

## 1.1. Statistical analysis of proliferation day 1

**Table S2.** Test of normality on proliferation day 1

| Tests of Normality |                                 |    |       |              |    |      |
|--------------------|---------------------------------|----|-------|--------------|----|------|
|                    | Kolmogorov-Smirnov <sup>a</sup> |    |       | Shapiro-Wilk |    |      |
|                    | Statistic                       | df | Sig.  | Statistic    | df | Sig. |
| CellNumberDay1     | .142                            | 18 | .200* | .953         | 18 | .477 |

\*. This is a lower bound of the true significance.

a. Lilliefors Significance Correction

The significance value (p-value) is 0.477, which is bigger than the  $\alpha$  (0.05), meaning that the data is normally distributed.

**Table S3.** Test of homogeneity of variance on proliferation day 1

### Test of Homogeneity of Variances

| CellNumberDay1   |     |     |      |
|------------------|-----|-----|------|
| Levene Statistic | df1 | df2 | Sig. |
| 6.011            | 2   | 15  | .012 |

The significance value (p-value) is 0.012, which is smaller than the  $\alpha$  (0.05), meaning that the data group comes from a population that has a different variance (not homogeneous).

**Table S4.** Test of significance on proliferation day 1

### ANOVA

| CellNumberDay1 |                |    |               |       |      |
|----------------|----------------|----|---------------|-------|------|
|                | Sum of Squares | df | Mean Square   | F     | Sig. |
| Between Groups | 316035885.778  | 2  | 158017942.889 | 6.164 | .011 |
| Within Groups  | 384513952.000  | 15 | 25634263.467  |       |      |
| Total          | 700549837.778  | 17 |               |       |      |

The significance value (p-value) is 0.011, which is smaller than the  $\alpha$  (0.05), meaning that there is an effect of scaffold use on hWJ-MSCs proliferation.

**Table S5. Post Hoc****Multiple Comparisons**

Dependent Variable: CellNumberDay1

|                    |                          | Mean Difference (I-J)    | Std. Error   | Sig. | 95% Confidence Interval |             |
|--------------------|--------------------------|--------------------------|--------------|------|-------------------------|-------------|
| (I) ExperimentDay1 | (J) ExperimentDay1       |                          |              |      | Lower Bound             | Upper Bound |
| Tukey HSD          | Control Day 1            | PCL Scaffold Day 1       | -1864.33333  | .802 | -9457.1057              | 5728.4390   |
|                    |                          | PCL/AgNps Scaffold Day 1 | -9673.00000* | .012 | -17265.7723             | -2080.2277  |
|                    | PCL Scaffold Day 1       | Control Day 1            | 1864.33333   | .802 | -5728.4390              | 9457.1057   |
|                    |                          | PCL/AgNps Scaffold Day 1 | -7808.66667* | .043 | -15401.4390             | -215.8943   |
|                    | PCL/AgNps Scaffold Day 1 | Control Day 1            | 9673.00000*  | .012 | 2080.2277               | 17265.7723  |
|                    |                          | PCL Scaffold Day 1       | 7808.66667*  | .043 | 215.8943                | 15401.4390  |
| Dunnett T3         | Control Day 1            | PCL Scaffold Day 1       | -1864.33333  | .926 | -12792.0243             | 9063.3576   |
|                    |                          | PCL/AgNps Scaffold Day 1 | -9673.00000  | .079 | -20602.8203             | 1256.8203   |
|                    | PCL Scaffold Day 1       | Control Day 1            | 1864.33333   | .926 | -9063.3576              | 12792.0243  |
|                    |                          | PCL/AgNps Scaffold Day 1 | -7808.66667* | .001 | -11979.2821             | -3638.0512  |
|                    | PCL/AgNps Scaffold Day 1 | Control Day 1            | 9673.00000   | .079 | -1256.8203              | 20602.8203  |
|                    |                          | PCL Scaffold Day 1       | 7808.66667*  | .001 | 3638.0512               | 11979.2821  |

\*. The mean difference is significant at the 0.05 level.

Because the data is not homogeneous, the Dunnett T3 test was used. The significance value (p-value) is 0.001, which is smaller than the  $\alpha$  (0.05), meaning that the PCL/AgNPs scaffold significantly induced the proliferation of hWJ-MSCs better than the PCL scaffold.

## 1.2. Statistical analysis of proliferation day 3

**Table S6.** Test of normality on proliferation day 3

| Tests of Normality |                                 |    |      |              |    |      |
|--------------------|---------------------------------|----|------|--------------|----|------|
|                    | Kolmogorov-Smirnov <sup>a</sup> |    |      | Shapiro-Wilk |    |      |
|                    | Statistic                       | df | Sig. | Statistic    | df | Sig. |
| CellNumberDay3     | .283                            | 18 | .000 | .774         | 18 | .001 |

a. Lilliefors Significance Correction

The significance value (p-value) is 0.001, which is smaller than the  $\alpha$  (0.05), meaning that the data is not normally distributed.

**Table S7.** Test of significance on proliferation day 3

### Mann-Whitney Test

| Ranks                        |    |           |              |  |
|------------------------------|----|-----------|--------------|--|
| ExperimentDay3               | N  | Mean Rank | Sum of Ranks |  |
| CellNumberDay3 Control Day 3 | 6  | 3.50      | 21.00        |  |
| PCL Scaffold Day 3           | 6  | 9.50      | 57.00        |  |
| Total                        | 12 |           |              |  |

| Test Statistics <sup>a</sup>   |                   |
|--------------------------------|-------------------|
|                                | CellNumberDay3    |
| Mann-Whitney U                 | .000              |
| Wilcoxon W                     | 21.000            |
| Z                              | -2.882            |
| Asymp. Sig. (2-tailed)         | .004              |
| Exact Sig. [2*(1-tailed Sig.)] | .002 <sup>b</sup> |

a. Grouping Variable: ExperimentDay3

b. Not corrected for ties.

The significance value (p-value) is 0.004, which is smaller than the  $\alpha$  (0.05), meaning that the PCL scaffold significantly induced the proliferation of hWJ-MSCs better than the control.

## Mann-Whitney Test

**Ranks**

| ExperimentDay3               | N  | Mean Rank | Sum of Ranks |
|------------------------------|----|-----------|--------------|
| CellNumberDay3 Control Day 3 | 6  | 3.50      | 21.00        |
| PCL/AgNps Scaffold Day 3     | 6  | 9.50      | 57.00        |
| Total                        | 12 |           |              |

**Test Statistics<sup>a</sup>**

|                                | CellNumberDay3    |
|--------------------------------|-------------------|
| Mann-Whitney U                 | .000              |
| Wilcoxon W                     | 21.000            |
| Z                              | -2.882            |
| Asymp. Sig. (2-tailed)         | .004              |
| Exact Sig. [2*(1-tailed Sig.)] | .002 <sup>b</sup> |

a. Grouping Variable: ExperimentDay3

b. Not corrected for ties.

The significance value (p-value) is 0.004, which is smaller than the  $\alpha$  (0.05), meaning that the PCL/AgNPs scaffold significantly induced the proliferation of hWJ-MSCs better than the control.

## Mann-Whitney Test

**Ranks**

| ExperimentDay3                    | N  | Mean Rank | Sum of Ranks |
|-----------------------------------|----|-----------|--------------|
| CellNumberDay3 PCL Scaffold Day 3 | 6  | 4.00      | 24.00        |
| PCL/AgNps Scaffold Day 3          | 6  | 9.00      | 54.00        |
| Total                             | 12 |           |              |

**Test Statistics<sup>a</sup>**

|                                | CellNumberDay3    |
|--------------------------------|-------------------|
| Mann-Whitney U                 | 3.000             |
| Wilcoxon W                     | 24.000            |
| Z                              | -2.402            |
| Asymp. Sig. (2-tailed)         | .016              |
| Exact Sig. [2*(1-tailed Sig.)] | .015 <sup>b</sup> |

a. Grouping Variable: ExperimentDay3

b. Not corrected for ties.

The significance value (p-value) is 0.016, which is smaller than the  $\alpha$  (0.05), meaning that the PCL/AgNPs scaffold significantly induced the proliferation of hWJ-MSCs better than the PCL scaffold.

### 1.3. Statistical analysis of proliferation day 5

**Table S8.** Test of normality on proliferation day 5

| Tests of Normality |                                 |    |      |              |    |      |
|--------------------|---------------------------------|----|------|--------------|----|------|
|                    | Kolmogorov-Smirnov <sup>a</sup> |    |      | Shapiro-Wilk |    |      |
|                    | Statistic                       | df | Sig. | Statistic    | df | Sig. |
| CellNumberDay5     | .248                            | 18 | .005 | .766         | 18 | .001 |

a. Lilliefors Significance Correction

The significance value (p-value) is 0.001, which is smaller than the  $\alpha$  (0.05), meaning that the data is not normally distributed.

**Table S9.** Test of significance on proliferation day 5

#### Mann-Whitney Test

| Ranks          |                    |    |           |              |
|----------------|--------------------|----|-----------|--------------|
|                | ExperimentDay5     | N  | Mean Rank | Sum of Ranks |
| CellNumberDay5 | Control Day 5      | 6  | 3.50      | 21.00        |
|                | PCL Scaffold Day 5 | 6  | 9.50      | 57.00        |
|                | Total              | 12 |           |              |

| Test Statistics <sup>a</sup>   |                   |
|--------------------------------|-------------------|
|                                | CellNumberDay5    |
| Mann-Whitney U                 | .000              |
| Wilcoxon W                     | 21.000            |
| Z                              | -2.882            |
| Asymp. Sig. (2-tailed)         | .004              |
| Exact Sig. [2*(1-tailed Sig.)] | .002 <sup>b</sup> |

a. Grouping Variable: ExperimentDay5

b. Not corrected for ties.

The significance value (p-value) is 0.004, which is smaller than the  $\alpha$  (0.05), meaning that the PCL scaffold significantly induced the proliferation of hWJ-MSCs better than the control.

## Mann-Whitney Test

| Ranks          |                          |    |           |              |
|----------------|--------------------------|----|-----------|--------------|
|                | ExperimentDay5           | N  | Mean Rank | Sum of Ranks |
| CellNumberDay5 | Control Day 5            | 6  | 3.50      | 21.00        |
|                | PCL/AgNps Scaffold Day 5 | 6  | 9.50      | 57.00        |
|                | Total                    | 12 |           |              |

| Test Statistics <sup>a</sup>   |                   |
|--------------------------------|-------------------|
|                                | CellNumberDay5    |
| Mann-Whitney U                 | .000              |
| Wilcoxon W                     | 21.000            |
| Z                              | -2.882            |
| Asymp. Sig. (2-tailed)         | .004              |
| Exact Sig. [2*(1-tailed Sig.)] | .002 <sup>b</sup> |

a. Grouping Variable: ExperimentDay5

b. Not corrected for ties.

The significance value (p-value) is 0.004, which is smaller than the  $\alpha$  (0.05), meaning that the PCL/AgNPs scaffold significantly induced the proliferation of hWJ-MSCs better than the control.

## Mann-Whitney Test

| Ranks          |                          |    |           |              |
|----------------|--------------------------|----|-----------|--------------|
|                | ExperimentDay5           | N  | Mean Rank | Sum of Ranks |
| CellNumberDay5 | PCL Scaffold Day 5       | 6  | 4.33      | 26.00        |
|                | PCL/AgNps Scaffold Day 5 | 6  | 8.67      | 52.00        |
|                | Total                    | 12 |           |              |

| Test Statistics <sup>a</sup>   |                   |
|--------------------------------|-------------------|
|                                | CellNumberDay5    |
| Mann-Whitney U                 | 5.000             |
| Wilcoxon W                     | 26.000            |
| Z                              | -2.082            |
| Asymp. Sig. (2-tailed)         | .037              |
| Exact Sig. [2*(1-tailed Sig.)] | .041 <sup>b</sup> |

a. Grouping Variable: ExperimentDay5

b. Not corrected for ties.

The significance value (p-value) is 0.037, which is smaller than the  $\alpha$  (0.05), meaning that the PCL/AgNPs scaffold significantly induced the proliferation of hWJ-MSCs better than the PCL scaffold.



#### 1.4. Statistical analysis of proliferation day 7

**Table S10.** Test of normality on proliferation day 7

| Tests of Normality |                                 |    |      |              |    |      |
|--------------------|---------------------------------|----|------|--------------|----|------|
|                    | Kolmogorov-Smirnov <sup>a</sup> |    |      | Shapiro-Wilk |    |      |
|                    | Statistic                       | df | Sig. | Statistic    | df | Sig. |
| CellNumberDay7     | .299                            | 18 | .000 | .729         | 18 | .000 |

a. Lilliefors Significance Correction

The significance value (p-value) is 0.000, which is smaller than the  $\alpha$  (0.05), meaning that the data is not normally distributed.

**Table S11.** Test of significance on proliferation day 7

#### Mann-Whitney Test

| Ranks          |                    |    |           |              |
|----------------|--------------------|----|-----------|--------------|
|                | ExperimentDay7     | N  | Mean Rank | Sum of Ranks |
| CellNumberDay7 | Control Day 7      | 6  | 3.50      | 21.00        |
|                | PCL Scaffold Day 7 | 6  | 9.50      | 57.00        |
|                | Total              | 12 |           |              |

| Test Statistics <sup>a</sup>   |                   |
|--------------------------------|-------------------|
|                                | CellNumberDay7    |
| Mann-Whitney U                 | .000              |
| Wilcoxon W                     | 21.000            |
| Z                              | -2.882            |
| Asymp. Sig. (2-tailed)         | .004              |
| Exact Sig. [2*(1-tailed Sig.)] | .002 <sup>b</sup> |

a. Grouping Variable: ExperimentDay7

b. Not corrected for ties.

The significance value (p-value) is 0.004, which is smaller than the  $\alpha$  (0.05), meaning that the PCL scaffold significantly induced the proliferation of hWJ-MSCs better than the control.

## Mann-Whitney Test

Ranks

| ExperimentDay7               | N  | Mean Rank | Sum of Ranks |
|------------------------------|----|-----------|--------------|
| CellNumberDay7 Control Day 7 | 6  | 3.50      | 21.00        |
| PCL/AgNps Scaffold Day 7     | 6  | 9.50      | 57.00        |
| Total                        | 12 |           |              |

Test Statistics<sup>a</sup>

|                                | CellNumberDay7    |
|--------------------------------|-------------------|
| Mann-Whitney U                 | .000              |
| Wilcoxon W                     | 21.000            |
| Z                              | -2.882            |
| Asymp. Sig. (2-tailed)         | .004              |
| Exact Sig. [2*(1-tailed Sig.)] | .002 <sup>b</sup> |

a. Grouping Variable: ExperimentDay7

b. Not corrected for ties.

The significance value (p-value) is 0.004, which is smaller than the  $\alpha$  (0.05), meaning that the PCL/AgNPs scaffold significantly induced the proliferation of hWJ-MSCs better than the control.

## Mann-Whitney Test

Ranks

| ExperimentDay7                    | N  | Mean Rank | Sum of Ranks |
|-----------------------------------|----|-----------|--------------|
| CellNumberDay7 PCL Scaffold Day 7 | 6  | 4.67      | 28.00        |
| PCL/AgNps Scaffold Day 7          | 6  | 8.33      | 50.00        |
| Total                             | 12 |           |              |

Test Statistics<sup>a</sup>

|                                | CellNumberDay7    |
|--------------------------------|-------------------|
| Mann-Whitney U                 | 7.000             |
| Wilcoxon W                     | 28.000            |
| Z                              | -1.761            |
| Asymp. Sig. (2-tailed)         | .078              |
| Exact Sig. [2*(1-tailed Sig.)] | .093 <sup>b</sup> |

a. Grouping Variable: ExperimentDay7

b. Not corrected for ties.

The significance value (p-value) is 0.078, which is bigger than the  $\alpha$  (0.05), meaning that the PCL/AgNPs scaffold did not significantly induce the proliferation of hWJ-MSCs better than the PCL scaffold.

### 1.5. Statistical analysis of proliferation day 14

**Table S12.** Test of normality on proliferation day 14

| Tests of Normality |                                 |    |      |              |    |      |
|--------------------|---------------------------------|----|------|--------------|----|------|
|                    | Kolmogorov-Smirnov <sup>a</sup> |    |      | Shapiro-Wilk |    |      |
|                    | Statistic                       | df | Sig. | Statistic    | df | Sig. |
| CellNumberDay14    | .327                            | 18 | .000 | .726         | 18 | .000 |

a. Lilliefors Significance Correction

The significance value (p-value) is 0.000, which is smaller than the  $\alpha$  (0.05), meaning that the data is not normally distributed.

**Table S13.** Test of significance on proliferation day 14

#### Mann-Whitney Test

| Ranks           |                     |    |           |              |
|-----------------|---------------------|----|-----------|--------------|
| ExperimentDay14 |                     | N  | Mean Rank | Sum of Ranks |
| CellNumberDay14 | Control Day 14      | 6  | 3.50      | 21.00        |
|                 | PCL Scaffold Day 14 | 6  | 9.50      | 57.00        |
|                 | Total               | 12 |           |              |

| Test Statistics <sup>a</sup>   |                   |
|--------------------------------|-------------------|
|                                | CellNumberDay14   |
| Mann-Whitney U                 | .000              |
| Wilcoxon W                     | 21.000            |
| Z                              | -2.882            |
| Asymp. Sig. (2-tailed)         | .004              |
| Exact Sig. [2*(1-tailed Sig.)] | .002 <sup>b</sup> |

a. Grouping Variable:  
ExperimentDay14

b. Not corrected for ties.

The significance value (p-value) is 0.004, which is smaller than the  $\alpha$  (0.05), meaning that the PCL scaffold significantly induced the proliferation of hWJ-MSCs better than the control.

## Mann-Whitney Test

Ranks

| ExperimentDay14                | N  | Mean Rank | Sum of Ranks |
|--------------------------------|----|-----------|--------------|
| CellNumberDay14 Control Day 14 | 6  | 3.50      | 21.00        |
| PCL/AgNps Scaffold Day 14      | 6  | 9.50      | 57.00        |
| Total                          | 12 |           |              |

Test Statistics<sup>a</sup>

|                                | CellNumberDay14   |
|--------------------------------|-------------------|
| Mann-Whitney U                 | .000              |
| Wilcoxon W                     | 21.000            |
| Z                              | -2.882            |
| Asymp. Sig. (2-tailed)         | .004              |
| Exact Sig. [2*(1-tailed Sig.)] | .002 <sup>b</sup> |

a. Grouping Variable:  
ExperimentDay14

b. Not corrected for ties.

The significance value (p-value) is 0.004, which is smaller than the  $\alpha$  (0.05), meaning that the PCL/AgNPs scaffold significantly induced the proliferation of hWJ-MSCs better than the control.

## Mann-Whitney Test

Ranks

| ExperimentDay14                     | N  | Mean Rank | Sum of Ranks |
|-------------------------------------|----|-----------|--------------|
| CellNumberDay14 PCL Scaffold Day 14 | 6  | 4.00      | 24.00        |
| PCL/AgNps Scaffold Day 14           | 6  | 9.00      | 54.00        |
| Total                               | 12 |           |              |

Test Statistics<sup>a</sup>

|                                | CellNumberDay14   |
|--------------------------------|-------------------|
| Mann-Whitney U                 | 3.000             |
| Wilcoxon W                     | 24.000            |
| Z                              | -2.402            |
| Asymp. Sig. (2-tailed)         | .016              |
| Exact Sig. [2*(1-tailed Sig.)] | .015 <sup>b</sup> |

a. Grouping Variable:  
ExperimentDay14

b. Not corrected for ties.

The significance value (p-value) is 0.016, which is smaller than the  $\alpha$  (0.05), meaning that the PCL/AgNPs scaffold significantly induced the proliferation of hWJ-MSCs better than the PCL scaffold.

## II. Statistical Analysis of RT-qPCR

**Table S14.** Overall *RUNX2* gene expression

| Treatment          | <i>RUNX2</i> Gene Expression |       |       |      |         |        |      |      |      |         |        |      |      |      |         |
|--------------------|------------------------------|-------|-------|------|---------|--------|------|------|------|---------|--------|------|------|------|---------|
|                    | Day 7                        |       |       |      |         | Day 14 |      |      |      |         | Day 21 |      |      |      |         |
|                    | 1                            | 2     | 3     | 4    | Average | 1      | 2    | 3    | 4    | Average | 1      | 2    | 3    | 4    | Average |
| Control            | 2,24                         | 0,55  | 0,71  | 1,14 | 1,16    | 1,60   | 1,35 | 0,61 | 0,76 | 1,08    | 0,91   | 0,72 | 1,08 | 1,40 | 1,03    |
| PCL Scaffold       | 4,03                         | 9,92  | 5,86  | 3,48 | 5,82    | 3,83   | 2,46 | 4,22 | 2,60 | 3,28    | 3,04   | 1,92 | 0,77 | 2,93 | 2,17    |
| PCL/AgNPs Scaffold | 5,97                         | 49,44 | 21,22 | 1,92 | 19,64   | 5,18   | 5,75 | 4,35 | 6,07 | 5,34    | 4,30   | 2,76 | 1,97 | 1,86 | 2,72    |

**Table S15.** Overall *COL1A1* gene expression

| Treatment          | <i>COL1A1</i> Gene Expression |      |      |      |         |        |      |      |      |         |        |      |      |      |         |
|--------------------|-------------------------------|------|------|------|---------|--------|------|------|------|---------|--------|------|------|------|---------|
|                    | Day 7                         |      |      |      |         | Day 14 |      |      |      |         | Day 21 |      |      |      |         |
|                    | 1                             | 2    | 3    | 4    | Average | 1      | 2    | 3    | 4    | Average | 1      | 2    | 3    | 4    | Average |
| Control            | 0,55                          | 0,72 | 1,64 | 1,54 | 1,11    | 1,17   | 1,11 | 0,81 | 0,95 | 1,01    | 1,22   | 1,46 | 0,78 | 0,72 | 1,05    |
| PCL Scaffold       | 0,33                          | 2,69 | 2,76 | 0,40 | 1,54    | 1,00   | 0,75 | 0,89 | 0,98 | 0,91    | 2,24   | 2,25 | 3,21 | 1,86 | 2,39    |
| PCL/AgNPs Scaffold | 2,97                          | 0,70 | 0,79 | 0,88 | 1,34    | 0,22   | 0,30 | 0,34 | 0,37 | 0,31    | 6,08   | 2,84 | 2,90 | 1,34 | 3,29    |

**Table S16.** Overall *OPN* gene expression

| Treatment          | <i>OPN</i> Gene Expression |      |      |      |         |        |       |       |       |         |        |      |      |      |         |
|--------------------|----------------------------|------|------|------|---------|--------|-------|-------|-------|---------|--------|------|------|------|---------|
|                    | Day 7                      |      |      |      |         | Day 14 |       |       |       |         | Day 21 |      |      |      |         |
|                    | 1                          | 2    | 3    | 4    | Average | 1      | 2     | 3     | 4     | Average | 1      | 2    | 3    | 4    | Average |
| Control            | 0,36                       | 1,15 | 1,61 | 1,48 | 1,15    | 1,240  | 0,525 | 1,173 | 1,310 | 1,062   | 1,88   | 1,22 | 0,55 | 0,80 | 1,11    |
| PCL Scaffold       | 1,42                       | 0,35 | 0,24 | 0,43 | 0,61    | 1,098  | 0,061 | 1,218 | 0,719 | 0,774   | 1,12   | 2,20 | 2,14 | 0,88 | 1,58    |
| PCL/AgNPs Scaffold | 0,60                       | 1,32 | 0,71 | 0,80 | 0,86    | 0,146  | 0,279 | 0,228 | 0,172 | 0,206   | 2,44   | 3,07 | 1,31 | 4,85 | 2,92    |

## 2.1. Statistical analysis of *RUNX2* gene expression day 7

**Table S17.** Test of normality on *RUNX2* gene expression day 7

|                          | Tests of Normality              |    |      |              |    |      |
|--------------------------|---------------------------------|----|------|--------------|----|------|
|                          | Kolmogorov-Smirnov <sup>a</sup> |    |      | Shapiro-Wilk |    |      |
|                          | Statistic                       | df | Sig. | Statistic    | df | Sig. |
| RUNX2GeneExpressionDay 7 | .331                            | 12 | .001 | .616         | 12 | .000 |

a. Lilliefors Significance Correction

The significance value (p-value) is 0.000, which is smaller than the  $\alpha$  (0.05), meaning that the data is not normally distributed.

**Table S18.** Test of significance on *RUNX2* gene expression day 7

### Mann-Whitney Test

| Ranks                   |                    |   |           |              |
|-------------------------|--------------------|---|-----------|--------------|
| Treatment               |                    | N | Mean Rank | Sum of Ranks |
| RUNX2GeneExpressionDay7 | Control Day 7      | 4 | 2.50      | 10.00        |
|                         | PCL Scaffold Day 7 | 4 | 6.50      | 26.00        |
|                         | Total              | 8 |           |              |

| Test Statistics <sup>a</sup>   |                          |
|--------------------------------|--------------------------|
|                                | RUNX2Gene ExpressionDay7 |
| Mann-Whitney U                 | .000                     |
| Wilcoxon W                     | 10.000                   |
| Z                              | -2.366                   |
| Asymp. Sig. (2-tailed)         | .018                     |
| Exact Sig. [2*(1-tailed Sig.)] | .029 <sup>b</sup>        |

a. Grouping Variable: Treatment

b. Not corrected for ties.

The significance value (p-value) is 0.018, which is smaller than the  $\alpha$  (0.05), meaning that PCL scaffold significantly increased *RUNX2* gene expression compared to control on day 7.

## Mann-Whitney Test

Ranks

| Treatment                                | N | Mean Rank | Sum of Ranks |
|------------------------------------------|---|-----------|--------------|
| RUNX2GeneExpressionDay7<br>Control Day 7 | 4 | 2.63      | 10.50        |
| PCL/AgNPs Scaffold Day 7                 | 4 | 6.38      | 25.50        |
| Total                                    | 8 |           |              |

Test Statistics<sup>a</sup>

|                                | RUNX2GeneExpressionDay7 |
|--------------------------------|-------------------------|
| Mann-Whitney U                 | .500                    |
| Wilcoxon W                     | 10.500                  |
| Z                              | -2.233                  |
| Asymp. Sig. (2-tailed)         | .026                    |
| Exact Sig. [2*(1-tailed Sig.)] | .029 <sup>b</sup>       |

a. Grouping Variable: Treatment

b. Not corrected for ties.

The significance value (p-value) is 0.026, which is smaller than the  $\alpha$  (0.05), meaning that PCL/AgNPs scaffold significantly increased *RUNX2* gene expression compared to control on day 7.

## Mann-Whitney Test

Ranks

| Treatment                                     | N | Mean Rank | Sum of Ranks |
|-----------------------------------------------|---|-----------|--------------|
| RUNX2GeneExpressionDay7<br>PCL Scaffold Day 7 | 4 | 3.88      | 15.50        |
| PCL/AgNPs Scaffold Day 7                      | 4 | 5.13      | 20.50        |
| Total                                         | 8 |           |              |

Test Statistics<sup>a</sup>

|                                | RUNX2GeneExpressionDay7 |
|--------------------------------|-------------------------|
| Mann-Whitney U                 | 5.500                   |
| Wilcoxon W                     | 15.500                  |
| Z                              | -.726                   |
| Asymp. Sig. (2-tailed)         | .468                    |
| Exact Sig. [2*(1-tailed Sig.)] | .486 <sup>b</sup>       |

a. Grouping Variable: Treatment

b. Not corrected for ties.

The significance value (p-value) is 0.468, which is bigger than the  $\alpha$  (0.05), meaning that the PCL/AgNPs scaffold did not significantly increase *RUNX2* gene expression compared to the PCL scaffold on day 7.

## 2.2. Statistical analysis of *RUNX2* gene expression day 14

**Table S19.** Test of normality on *RUNX2* gene expression day 14

|                          | Tests of Normality              |    |       |              |    |      |
|--------------------------|---------------------------------|----|-------|--------------|----|------|
|                          | Kolmogorov-Smirnov <sup>a</sup> |    |       | Shapiro-Wilk |    |      |
|                          | Statistic                       | df | Sig.  | Statistic    | df | Sig. |
| RUNX2GeneExpressionDay14 | .165                            | 12 | .200* | .901         | 12 | .164 |

\*. This is a lower bound of the true significance.

a. Lilliefors Significance Correction

The significance value (p-value) is 0.164, which is bigger than the  $\alpha$  (0.05), meaning that the data is normally distributed.

**Table S20.** Test of homogeneity of variance on *RUNX2* gene expression day 14

### Test of Homogeneity of Variances

RUNX2GeneExpressionDay14

| Levene Statistic | df1 | df2 | Sig. |
|------------------|-----|-----|------|
| 1.421            | 2   | 9   | .291 |

The significance value (p-value) is 0.291, which is bigger than the  $\alpha$  (0.05), meaning that the data group comes from a population that has the same variance (homogeneous).

**Table S21.** Test of significance on *RUNX2* gene expression day 14

### ANOVA

RUNX2GeneExpressionDay14

|                | Sum of Squares | df | Mean Square | F      | Sig. |
|----------------|----------------|----|-------------|--------|------|
| Between Groups | 32.000         | 2  | 16.000      | 23.040 | .000 |
| Within Groups  | 6.250          | 9  | .694        |        |      |
| Total          | 38.250         | 11 |             |        |      |

The significance value (p-value) of 0.000 is smaller than  $\alpha$  (0.05), meaning that there is a significant influence of scaffold use on *RUNX2* gene expression on day 14.



**Table S22. Post Hoc**

**Multiple Comparisons**

Dependent Variable: RUNX2GeneExpressionDay14

Tukey HSD

| (I) TreatmentDay14        | (J) TreatmentDay14        | Mean Difference (I-J) | Std. Error | Sig. | 95% Confidence Interval |             |
|---------------------------|---------------------------|-----------------------|------------|------|-------------------------|-------------|
|                           |                           |                       |            |      | Lower Bound             | Upper Bound |
| Control Day 14            | PCL Scaffold Day 14       | -2.00000*             | .58926     | .020 | -3.6452                 | -.3548      |
|                           | PCL/AgNPs Scaffold Day 14 | -4.00000*             | .58926     | .000 | -5.6452                 | -2.3548     |
| PCL Scaffold Day 14       | Control Day 14            | 2.00000*              | .58926     | .020 | .3548                   | 3.6452      |
|                           | PCL/AgNPs Scaffold Day 14 | -2.00000*             | .58926     | .020 | -3.6452                 | -.3548      |
| PCL/AgNPs Scaffold Day 14 | Control Day 14            | 4.00000*              | .58926     | .000 | 2.3548                  | 5.6452      |
|                           | PCL Scaffold Day 14       | 2.00000*              | .58926     | .020 | .3548                   | 3.6452      |

\*. The mean difference is significant at the 0.05 level.

- The significance value (p-value) is smaller than the  $\alpha$  (0.05), meaning that PCL scaffold and PCL/AgNPs scaffold significantly increased *RUNX2* gene expression compared to control on day 14.
- The significance value (p-value) is smaller than the  $\alpha$  (0.05), meaning that PCL/AgNPs scaffold significantly increased *RUNX2* gene expression compared to PCL scaffold on day 14.

### 2.3. Statistical analysis of *RUNX2* gene expression day 21

**Table S23.** Test of normality on *RUNX2* gene expression day 21

|                           | Tests of Normality              |    |      |              |    |      |
|---------------------------|---------------------------------|----|------|--------------|----|------|
|                           | Kolmogorov-Smirnov <sup>a</sup> |    |      | Shapiro-Wilk |    |      |
|                           | Statistic                       | df | Sig. | Statistic    | df | Sig. |
| RUNX2GeneExpressionDay 21 | .247                            | 12 | .041 | .846         | 12 | .033 |

a. Lilliefors Significance Correction

The significance value (p-value) is 0.033, which is smaller than the  $\alpha$  (0.05), meaning that the data is not normally distributed.

**Table S24.** Test of significance on *RUNX2* gene expression day 21

#### Mann-Whitney Test

| Ranks                    |                     |   |           |              |
|--------------------------|---------------------|---|-----------|--------------|
| Treatment                |                     | N | Mean Rank | Sum of Ranks |
| RUNX2GeneExpressionDay21 | Control Day 21      | 4 | 3.00      | 12.00        |
|                          | PCL Scaffold Day 21 | 4 | 6.00      | 24.00        |
|                          | Total               | 8 |           |              |

| Test Statistics <sup>a</sup>   |                          |
|--------------------------------|--------------------------|
|                                | RUNX2GeneExpressionDay21 |
| Mann-Whitney U                 | 2.000                    |
| Wilcoxon W                     | 12.000                   |
| Z                              | -2.000                   |
| Asymp. Sig. (2-tailed)         | .046                     |
| Exact Sig. [2*(1-tailed Sig.)] | .114 <sup>b</sup>        |

a. Grouping Variable: Treatment

b. Not corrected for ties.

The significance value (p-value) is 0.046, which is smaller than the  $\alpha$  (0.05), meaning that PCL scaffold significantly increased *RUNX2* gene expression compared to control on day 21.

## Mann-Whitney Test

Ranks

|                          | Treatment                 | N | Mean Rank | Sum of Ranks |
|--------------------------|---------------------------|---|-----------|--------------|
| RUNX2GeneExpressionDay21 | Control Day 21            | 4 | 2.50      | 10.00        |
|                          | PCL/AgNPs Scaffold Day 21 | 4 | 6.50      | 26.00        |
|                          | Total                     | 8 |           |              |

Test Statistics<sup>a</sup>

|                                | RUNX2Gene ExpressionDay21 |
|--------------------------------|---------------------------|
| Mann-Whitney U                 | .000                      |
| Wilcoxon W                     | 10.000                    |
| Z                              | -2.477                    |
| Asymp. Sig. (2-tailed)         | .013                      |
| Exact Sig. [2*(1-tailed Sig.)] | .029 <sup>b</sup>         |

a. Grouping Variable: Treatment

b. Not corrected for ties.

The significance value (p-value) is 0.013, which is smaller than the  $\alpha$  (0.05), meaning that PCL/AgNPs scaffold significantly increased *RUNX2* gene expression compared to control on day 21.

## Mann-Whitney Test

Ranks

|                          | Treatment                 | N | Mean Rank | Sum of Ranks |
|--------------------------|---------------------------|---|-----------|--------------|
| RUNX2GeneExpressionDay21 | PCL Scaffold Day 21       | 4 | 4.00      | 16.00        |
|                          | PCL/AgNPs Scaffold Day 21 | 4 | 5.00      | 20.00        |
|                          | Total                     | 8 |           |              |

Test Statistics<sup>a</sup>

|                                | RUNX2Gene ExpressionDay21 |
|--------------------------------|---------------------------|
| Mann-Whitney U                 | 6.000                     |
| Wilcoxon W                     | 16.000                    |
| Z                              | -.607                     |
| Asymp. Sig. (2-tailed)         | .544                      |
| Exact Sig. [2*(1-tailed Sig.)] | .686 <sup>b</sup>         |

a. Grouping Variable: Treatment

b. Not corrected for ties.

The significance value (p-value) is 0.544, which is bigger than the  $\alpha$  (0.05), meaning that the PCL/AgNPs scaffold did not significantly increase *RUNX2* gene expression compared to the PCL scaffold on day 21.

## 2.4. Statistical analysis of *COL1A1* gene expression day 7

**Table S25.** Test of normality on *COL1A1* gene expression day 7

|                          | Tests of Normality              |    |      |              |    |      |
|--------------------------|---------------------------------|----|------|--------------|----|------|
|                          | Kolmogorov-Smirnov <sup>a</sup> |    |      | Shapiro-Wilk |    |      |
|                          | Statistic                       | df | Sig. | Statistic    | df | Sig. |
| COL1A1GeneExpressionDay7 | .261                            | 12 | .023 | .837         | 12 | .026 |

a. Lilliefors Significance Correction

The significance value (p-value) is 0.026, which is smaller than the  $\alpha$  (0.05), meaning that the data is not normally distributed.

**Table S26.** Test of significance on *COL1A1* gene expression day 7

### Kruskal-Wallis Test

| Ranks                    |                          |    |           |
|--------------------------|--------------------------|----|-----------|
|                          | TreatmentDay7            | N  | Mean Rank |
| COL1A1GeneExpressionDay7 | Control Day 7            | 4  | 6.25      |
|                          | PCL Scaffold Day 7       | 4  | 6.00      |
|                          | PCL/AgNPs Scaffold Day 7 | 4  | 7.25      |
|                          | Total                    | 12 |           |

### Test Statistics<sup>a,b</sup>

|             | COL1A1GeneExpressionDay7 |
|-------------|--------------------------|
| Chi-Square  | .269                     |
| df          | 2                        |
| Asymp. Sig. | .874                     |

a. Kruskal Wallis Test

b. Grouping Variable:  
TreatmentDay7

The significance value (p-value) is 0.874, which is bigger than the  $\alpha$  (0.05), meaning there are no different groups.

## 2.5. Statistical analysis of *COL1A1* gene expression day 14

**Table S27.** Test of normality on *COL1A1* gene expression day 14

|                           | Tests of Normality              |    |       |              |    |      |
|---------------------------|---------------------------------|----|-------|--------------|----|------|
|                           | Kolmogorov-Smirnov <sup>a</sup> |    |       | Shapiro-Wilk |    |      |
|                           | Statistic                       | df | Sig.  | Statistic    | df | Sig. |
| COL1A1GeneExpressionDay14 | .197                            | 12 | .200* | .882         | 12 | .094 |

\*. This is a lower bound of the true significance.

a. Lilliefors Significance Correction

The significance value (p-value) is 0.094, which is bigger than the  $\alpha$  (0.05), meaning that the data is normally distributed.

**Table S28.** Test of homogeneity of variance on *COL1A1* gene expression day 14

### Test of Homogeneity of Variances

COL1A1GeneExpressionDay14

| Levene Statistic | df1 | df2 | Sig. |
|------------------|-----|-----|------|
| 2.643            | 2   | 9   | .125 |

The significance value (p-value) is 0.125, which is bigger than the  $\alpha$  (0.05), meaning that the data group comes from a population that has the same variance (homogeneous).

**Table S29.** Test of significance on *COL1A1* gene expression day 14

### ANOVA

COL1A1GeneExpressionDay14

|                | Sum of Squares | df | Mean Square | F      | Sig. |
|----------------|----------------|----|-------------|--------|------|
| Between Groups | 1.148          | 2  | .574        | 39.138 | .000 |
| Within Groups  | .132           | 9  | .015        |        |      |
| Total          | 1.280          | 11 |             |        |      |

The significance value (p-value) of 0.000 is smaller than  $\alpha$  (0.05), meaning that there is a significant influence of scaffold use on *COL1A1* gene expression on day 14.

## 2.6. Statistical analysis of *COL1A1* gene expression day 21

**Table S30.** Test of normality on *COL1A1* gene expression day 21

|                           | Tests of Normality              |    |       |              |    |      |
|---------------------------|---------------------------------|----|-------|--------------|----|------|
|                           | Kolmogorov-Smirnov <sup>a</sup> |    |       | Shapiro-Wilk |    |      |
|                           | Statistic                       | df | Sig.  | Statistic    | df | Sig. |
| COL1A1GeneExpressionDay21 | .171                            | 12 | .200* | .845         | 12 | .032 |

\*. This is a lower bound of the true significance.

a. Lilliefors Significance Correction

The significance value (p-value) is 0.032, which is smaller than the  $\alpha$  (0.05), meaning that the data is not normally distributed.

**Table S31.** Test of significance on *COL1A1* gene expression day 21

### Mann-Whitney Test

| Ranks                     |                     |   |           |              |
|---------------------------|---------------------|---|-----------|--------------|
|                           | TreatmentDay21      | N | Mean Rank | Sum of Ranks |
| COL1A1GeneExpressionDay21 | Control Day 21      | 4 | 2.50      | 10.00        |
|                           | PCL Scaffold Day 21 | 4 | 6.50      | 26.00        |
|                           | Total               | 8 |           |              |

| Test Statistics <sup>a</sup>   |                           |
|--------------------------------|---------------------------|
|                                | COL1A1GeneExpressionDay21 |
| Mann-Whitney U                 | .000                      |
| Wilcoxon W                     | 10.000                    |
| Z                              | -2.309                    |
| Asymp. Sig. (2-tailed)         | .021                      |
| Exact Sig. [2*(1-tailed Sig.)] | .029 <sup>b</sup>         |

a. Grouping Variable:  
TreatmentDay21

b. Not corrected for ties.

The significance value (p-value) is 0.021, which is smaller than the  $\alpha$  (0.05), meaning that PCL scaffold significantly increased *COL1A1* gene expression compared to control on day 21.

## Mann-Whitney Test

| Ranks                        |                           | N | Mean Rank | Sum of Ranks |
|------------------------------|---------------------------|---|-----------|--------------|
| COL1A1 Gene Expression Day21 | TreatmentDay21            |   |           |              |
|                              | Control Day 21            | 4 | 2.75      | 11.00        |
|                              | PCL/AgNPs Scaffold Day 21 | 4 | 6.25      | 25.00        |
| Total                        |                           | 8 |           |              |

| Test Statistics <sup>a</sup>   |                              |
|--------------------------------|------------------------------|
|                                | COL1A1 Gene Expression Day21 |
| Mann-Whitney U                 | 1.000                        |
| Wilcoxon W                     | 11.000                       |
| Z                              | -2.021                       |
| Asymp. Sig. (2-tailed)         | .043                         |
| Exact Sig. [2*(1-tailed Sig.)] | .057 <sup>b</sup>            |

a. Grouping Variable:  
TreatmentDay21

b. Not corrected for ties.

The significance value (p-value) is 0.043, which is smaller than the  $\alpha$  (0.05), meaning that PCL/AgNPs scaffold significantly increased *COL1A1* gene expression compared to control on day 21.

## Mann-Whitney Test

| Ranks                        |                           | N | Mean Rank | Sum of Ranks |
|------------------------------|---------------------------|---|-----------|--------------|
| COL1A1 Gene Expression Day21 | TreatmentDay21            |   |           |              |
|                              | PCL Scaffold Day 21       | 4 | 4.00      | 16.00        |
|                              | PCL/AgNPs Scaffold Day 21 | 4 | 5.00      | 20.00        |
| Total                        |                           | 8 |           |              |

| Test Statistics <sup>a</sup>   |                              |
|--------------------------------|------------------------------|
|                                | COL1A1 Gene Expression Day21 |
| Mann-Whitney U                 | 6.000                        |
| Wilcoxon W                     | 16.000                       |
| Z                              | -.577                        |
| Asymp. Sig. (2-tailed)         | .564                         |
| Exact Sig. [2*(1-tailed Sig.)] | .686 <sup>b</sup>            |

a. Grouping Variable:  
TreatmentDay21

b. Not corrected for ties.

The significance value (p-value) is 0.564, which is bigger than the  $\alpha$  (0.05), meaning that the PCL/AgNPs scaffold did not significantly increase *COL1A1* gene expression compared to the PCL scaffold on day 21.

## 2.7. Statistical analysis of *OPN* gene expression day 7

**Table S32.** Test of normality on *OPN* gene expression day 7

| Tests of Normality    |                                 |    |       |              |    |      |
|-----------------------|---------------------------------|----|-------|--------------|----|------|
|                       | Kolmogorov-Smirnov <sup>a</sup> |    |       | Shapiro-Wilk |    |      |
|                       | Statistic                       | df | Sig.  | Statistic    | df | Sig. |
| OPNGeneExpressionDay7 | .149                            | 12 | .200* | .903         | 12 | .173 |

\*. This is a lower bound of the true significance.

a. Lilliefors Significance Correction

The significance value (p-value) is 0.173, which is bigger than the  $\alpha$  (0.05), meaning that the data is normally distributed.

**Table S33.** Test of homogeneity of variance on *OPN* gene expression day 7

### Test of Homogeneity of Variances

OPNGeneExpressionDay7

| Levene Statistic | df1 | df2 | Sig. |
|------------------|-----|-----|------|
| .520             | 2   | 9   | .611 |

The significance value (p-value) is 0.611, which is bigger than the  $\alpha$  (0.05), meaning that the data group comes from a population that has the same variance (homogeneous).

**Table S34.** Test of significance on *OPN* gene expression day 7

### ANOVA

OPNGeneExpressionDay7

|                | Sum of Squares | df | Mean Square | F     | Sig. |
|----------------|----------------|----|-------------|-------|------|
| Between Groups | .587           | 2  | .294        | 1.243 | .334 |
| Within Groups  | 2.127          | 9  | .236        |       |      |
| Total          | 2.714          | 11 |             |       |      |

The significance value (p-value) of 0.334 is bigger than  $\alpha$  (0.05), meaning that there is no significant influence of scaffold use on *OPN* gene expression on day 7.



## 2.8. Statistical analysis of *OPN* gene expression day 14

**Table S35.** Test of normality on *OPN* gene expression day 14

| Tests of Normality     |                                 |    |      |              |    |      |
|------------------------|---------------------------------|----|------|--------------|----|------|
|                        | Kolmogorov-Smirnov <sup>a</sup> |    |      | Shapiro-Wilk |    |      |
|                        | Statistic                       | df | Sig. | Statistic    | df | Sig. |
| OPNGeneExpressionDay14 | .215                            | 12 | .130 | .850         | 12 | .037 |

a. Lilliefors Significance Correction

The significance value (p-value) is 0.037, which is smaller than the  $\alpha$  (0.05), meaning that the data is not normally distributed.

**Table S36.** Test of significance on *OPN* gene expression day 14

### Kruskal-Wallis Test

| Ranks                  |                           |    |           |
|------------------------|---------------------------|----|-----------|
|                        | TreatmentDay14            | N  | Mean Rank |
| OPNGeneExpressionDay14 | Control Day 14            | 4  | 9.50      |
|                        | PCL Scaffold Day 14       | 4  | 6.50      |
|                        | PCL/AgNPs Scaffold Day 14 | 4  | 3.50      |
|                        | Total                     | 12 |           |

| Test Statistics <sup>a,b</sup> |                            |
|--------------------------------|----------------------------|
|                                | OPNGeneExp<br>ressionDay14 |
| Chi-Square                     | 5.538                      |
| df                             | 2                          |
| Asymp. Sig.                    | .063                       |

a. Kruskal Wallis Test

b. Grouping Variable:  
TreatmentDay14

The significance value (p-value) is 0.063, which is bigger than the  $\alpha$  (0.05), meaning there are no different groups.

## 2.9. Statistical analysis of *OPN* gene expression day 21

**Table S37.** Test of normality on *OPN* gene expression day 21

| Tests of Normality     |                                 |    |       |              |    |      |
|------------------------|---------------------------------|----|-------|--------------|----|------|
|                        | Kolmogorov-Smirnov <sup>a</sup> |    |       | Shapiro-Wilk |    |      |
|                        | Statistic                       | df | Sig.  | Statistic    | df | Sig. |
| OPNGeneExpressionDay21 | .179                            | 12 | .200* | .879         | 12 | .085 |

\*. This is a lower bound of the true significance.

a. Lilliefors Significance Correction

The significance value (p-value) is 0.085, which is bigger than the  $\alpha$  (0.05), meaning that the data is normally distributed.

**Table S38.** Test of homogeneity of variance on *OPN* gene expression day 21

| Test of Homogeneity of Variances |     |     |      |
|----------------------------------|-----|-----|------|
| OPNGeneExpressionDay21           |     |     |      |
| Levene Statistic                 | df1 | df2 | Sig. |
| 1.424                            | 2   | 9   | .290 |

The significance value (p-value) is 0.290, which is bigger than the  $\alpha$  (0.05), meaning that the data group comes from a population that has the same variance (homogeneous).

**Table S39.** Test of significance on *OPN* gene expression day 21

| ANOVA                  |                |    |             |       |      |
|------------------------|----------------|----|-------------|-------|------|
| OPNGeneExpressionDay21 |                |    |             |       |      |
|                        | Sum of Squares | df | Mean Square | F     | Sig. |
| Between Groups         | 7.013          | 2  | 3.507       | 3.516 | .074 |
| Within Groups          | 8.977          | 9  | .997        |       |      |
| Total                  | 15.991         | 11 |             |       |      |

The significance value (p-value) of 0.074 is bigger than  $\alpha$  (0.05), meaning that there is no significant influence of scaffold use on *OPN* gene expression on day 21.

### III. Statistical analysis of Alkaline Phosphatase Detection

**Table S40.** Overall alkaline phosphatase detection results

| Day                | Day 7   |     |           | Day 14  |     |           | Day 21  |     |           |
|--------------------|---------|-----|-----------|---------|-----|-----------|---------|-----|-----------|
| ALP Activity (U/L) | Control | PCL | PCL/AgNPs | Control | PCL | PCL/AgNPs | Control | PCL | PCL/AgNPs |
| ALP1               | 482     | 285 | 406       | 483     | 430 | 570       | 554     | 602 | 760       |
| ALP2               | 272     | 194 | 373       | 380     | 480 | 568       | 513     | 546 | 799       |
| ALP3               | 400     | 176 | 364       | 436     | 483 | 596       | 487     | 585 | 745       |
| Average            | 385     | 218 | 381       | 433     | 464 | 578       | 518     | 578 | 768       |
| Stdev              | 106     | 59  | 22        | 51      | 30  | 16        | 34      | 29  | 28        |

**Table S41.** Test of normality on alkaline phosphatase detection results

| Tests of Normality |                                 |    |       |              |    |      |
|--------------------|---------------------------------|----|-------|--------------|----|------|
|                    | Kolmogorov-Smirnov <sup>a</sup> |    |       | Shapiro-Wilk |    |      |
|                    | Statistic                       | df | Sig.  | Statistic    | df | Sig. |
| ALPActivity        | .105                            | 27 | .200* | .972         | 27 | .664 |

\*. This is a lower bound of the true significance.

a. Lilliefors Significance Correction

The significance value (p-value) is 0.664, which is bigger than the  $\alpha$  (0.05), meaning that the data is normally distributed.

**Table S42.** Test of homogeneity of variance on alkaline phosphatase detection results

#### Test of Homogeneity of Variances

ALPActivity

| Levene Statistic | df1 | df2 | Sig. |
|------------------|-----|-----|------|
| 2.152            | 8   | 18  | .084 |

The significance value (p-value) is 0.084, which is bigger than the  $\alpha$  (0.05), meaning that the data group comes from a population that has the same variance (homogeneous).

**Table S43.** Test of significance on alkaline phosphatase detection results

#### ANOVA

ALPActivity

|                | Sum of Squares | df | Mean Square | F      | Sig. |
|----------------|----------------|----|-------------|--------|------|
| Between Groups | 580029.333     | 8  | 72503.667   | 30.159 | .000 |
| Within Groups  | 43272.667      | 18 | 2404.037    |        |      |
| Total          | 623302.000     | 26 |             |        |      |

The significance value (p-value) is 0.000, which is smaller than the  $\alpha$  (0.05), meaning that there was a significant effect of scaffold use on the ALP activity of hWJ-MSCs.

**Table S44. Post Hoc**

**Multiple Comparisons**

Dependent Variable: ALP Activity

Tukey HSD

| (I) Treatment            | (J) Treatment             | Mean Difference (I-J) | Std. Error | Sig.  | 95% Confidence Interval |             |
|--------------------------|---------------------------|-----------------------|------------|-------|-------------------------|-------------|
|                          |                           |                       |            |       | Lower Bound             | Upper Bound |
| Control day 7            | PCL Scaffold day 7        | 166.33333*            | 40.03363   | .013  | 26.0610                 | 306.6056    |
|                          | PCL/AgNPs Scaffold day 7  | 3.66667               | 40.03363   | 1.000 | -136.6056               | 143.9390    |
|                          | Control day 14            | -48.33333             | 40.03363   | .945  | -188.6056               | 91.9390     |
|                          | PCL Scaffold day 14       | -79.66667             | 40.03363   | .568  | -219.9390               | 60.6056     |
|                          | PCL/AgNPs Scaffold day 14 | -193.33333*           | 40.03363   | .003  | -333.6056               | -53.0610    |
|                          | Control day 21            | -133.33333            | 40.03363   | .070  | -273.6056               | 6.9390      |
|                          | PCL Scaffold day 21       | -193.00000*           | 40.03363   | .003  | -333.2723               | -52.7277    |
|                          | PCL/AgNPs Scaffold day 21 | -383.33333*           | 40.03363   | .000  | -523.6056               | -243.0610   |
|                          | Control day 7             | -166.33333*           | 40.03363   | .013  | -306.6056               | -26.0610    |
|                          | PCL/AgNPs Scaffold day 7  | -162.66667*           | 40.03363   | .016  | -302.9390               | -22.3944    |
| PCL Scaffold day 7       | Control day 14            | -214.66667*           | 40.03363   | .001  | -354.9390               | -74.3944    |
|                          | PCL Scaffold day 14       | -246.00000*           | 40.03363   | .000  | -386.2723               | -105.7277   |
|                          | PCL/AgNPs Scaffold day 14 | -359.66667*           | 40.03363   | .000  | -499.9390               | -219.3944   |
|                          | Control day 21            | -299.66667*           | 40.03363   | .000  | -439.9390               | -159.3944   |
|                          | PCL Scaffold day 21       | -359.33333*           | 40.03363   | .000  | -499.6056               | -219.0610   |
|                          | PCL/AgNPs Scaffold day 21 | -549.66667*           | 40.03363   | .000  | -689.9390               | -409.3944   |
|                          | Control day 7             | -3.66667              | 40.03363   | 1.000 | -143.9390               | 136.6056    |
|                          | PCL Scaffold day 7        | 162.66667*            | 40.03363   | .016  | 22.3944                 | 302.9390    |
|                          | Control day 14            | -52.00000             | 40.03363   | .919  | -192.2723               | 88.2723     |
|                          | PCL Scaffold day 14       | -83.33333             | 40.03363   | .513  | -223.6056               | 56.9390     |
| PCL/AgNPs Scaffold day 7 | PCL/AgNPs Scaffold day 14 | -197.00000*           | 40.03363   | .003  | -337.2723               | -56.7277    |
|                          | Control day 21            | -137.00000            | 40.03363   | .059  | -277.2723               | 3.2723      |
|                          | PCL Scaffold day 21       | -196.66667*           | 40.03363   | .003  | -336.9390               | -56.3944    |
|                          | PCL/AgNPs Scaffold day 21 | -387.00000*           | 40.03363   | .000  | -527.2723               | -246.7277   |
|                          | Control day 7             | 48.33333              | 40.03363   | .945  | -91.9390                | 188.6056    |
|                          | PCL Scaffold day 7        | 214.66667*            | 40.03363   | .001  | 74.3944                 | 354.9390    |
|                          | PCL/AgNPs Scaffold day 7  | 52.00000              | 40.03363   | .919  | -88.2723                | 192.2723    |
|                          | PCL Scaffold day 14       | -31.33333             | 40.03363   | .996  | -171.6056               | 108.9390    |
|                          | PCL/AgNPs Scaffold day 14 | -145.00000*           | 40.03363   | .040  | -285.2723               | -4.7277     |
|                          | Control day 21            | -85.00000             | 40.03363   | .489  | -225.2723               | 55.2723     |
| Control day 14           | PCL Scaffold day 21       | -144.66667*           | 40.03363   | .040  | -284.9390               | -4.3944     |
|                          | PCL/AgNPs Scaffold day 21 | -335.00000*           | 40.03363   | .000  | -475.2723               | -194.7277   |
|                          | Control day 7             | 79.66667              | 40.03363   | .568  | -60.6056                | 219.9390    |
|                          | PCL Scaffold day 7        | 246.00000*            | 40.03363   | .000  | 105.7277                | 386.2723    |
|                          | PCL/AgNPs Scaffold day 7  | 83.33333              | 40.03363   | .513  | -56.9390                | 223.6056    |
| PCL Scaffold day 14      |                           |                       |            |       |                         |             |
|                          |                           |                       |            |       |                         |             |
|                          |                           |                       |            |       |                         |             |
|                          |                           |                       |            |       |                         |             |
|                          |                           |                       |            |       |                         |             |
|                          |                           |                       |            |       |                         |             |
|                          |                           |                       |            |       |                         |             |
|                          |                           |                       |            |       |                         |             |
|                          |                           |                       |            |       |                         |             |
|                          |                           |                       |            |       |                         |             |

|                           |                           |             |          |       |           |           |
|---------------------------|---------------------------|-------------|----------|-------|-----------|-----------|
| PCL/AgNPs Scaffold day 14 | Control day 14            | 31.33333    | 40.03363 | .996  | -108.9390 | 171.6056  |
|                           | PCL/AgNPs Scaffold day 14 | -113.66667  | 40.03363 | .170  | -253.9390 | 26.6056   |
|                           | Control day 21            | -53.66667   | 40.03363 | .905  | -193.9390 | 86.6056   |
|                           | PCL Scaffold day 21       | -113.33333  | 40.03363 | .173  | -253.6056 | 26.9390   |
|                           | PCL/AgNPs Scaffold day 21 | -303.66667* | 40.03363 | .000  | -443.9390 | -163.3944 |
|                           | Control day 7             | 193.33333*  | 40.03363 | .003  | 53.0610   | 333.6056  |
|                           | PCL Scaffold day 7        | 359.66667*  | 40.03363 | .000  | 219.3944  | 499.9390  |
|                           | PCL/AgNPs Scaffold day 7  | 197.00000*  | 40.03363 | .003  | 56.7277   | 337.2723  |
|                           | Control day 14            | 145.00000*  | 40.03363 | .040  | 4.7277    | 285.2723  |
|                           | PCL Scaffold day 14       | 113.66667   | 40.03363 | .170  | -26.6056  | 253.9390  |
|                           | Control day 21            | 60.00000    | 40.03363 | .842  | -80.2723  | 200.2723  |
|                           | PCL Scaffold day 21       | .33333      | 40.03363 | 1.000 | -139.9390 | 140.6056  |
|                           | PCL/AgNPs Scaffold day 21 | -190.00000* | 40.03363 | .004  | -330.2723 | -49.7277  |
|                           | Control day 7             | 133.33333   | 40.03363 | .070  | -6.9390   | 273.6056  |
| Control day 21            | PCL Scaffold day 7        | 299.66667*  | 40.03363 | .000  | 159.3944  | 439.9390  |
|                           | PCL/AgNPs Scaffold day 7  | 137.00000   | 40.03363 | .059  | -3.2723   | 277.2723  |
|                           | Control day 14            | 85.00000    | 40.03363 | .489  | -55.2723  | 225.2723  |
|                           | PCL Scaffold day 14       | 53.66667    | 40.03363 | .905  | -86.6056  | 193.9390  |
|                           | PCL/AgNPs Scaffold day 14 | -60.00000   | 40.03363 | .842  | -200.2723 | 80.2723   |
|                           | PCL Scaffold day 21       | -59.66667   | 40.03363 | .846  | -199.9390 | 80.6056   |
|                           | PCL/AgNPs Scaffold day 21 | -250.00000* | 40.03363 | .000  | -390.2723 | -109.7277 |
|                           | Control day 7             | 193.00000*  | 40.03363 | .003  | 52.7277   | 333.2723  |
|                           | PCL Scaffold day 7        | 359.33333*  | 40.03363 | .000  | 219.0610  | 499.6056  |
|                           | PCL/AgNPs Scaffold day 7  | 196.66667*  | 40.03363 | .003  | 56.3944   | 336.9390  |
|                           | Control day 14            | 144.66667*  | 40.03363 | .040  | 4.3944    | 284.9390  |
|                           | PCL Scaffold day 14       | 113.33333   | 40.03363 | .173  | -26.9390  | 253.6056  |
|                           | PCL/AgNPs Scaffold day 14 | -.33333     | 40.03363 | 1.000 | -140.6056 | 139.9390  |
|                           | Control day 21            | 59.66667    | 40.03363 | .846  | -80.6056  | 199.9390  |
| PCL Scaffold day 21       | PCL/AgNPs Scaffold day 21 | -190.33333* | 40.03363 | .004  | -330.6056 | -50.0610  |
|                           | Control day 7             | 383.33333*  | 40.03363 | .000  | 243.0610  | 523.6056  |
|                           | PCL Scaffold day 7        | 549.66667*  | 40.03363 | .000  | 409.3944  | 689.9390  |
|                           | PCL/AgNPs Scaffold day 7  | 387.00000*  | 40.03363 | .000  | 246.7277  | 527.2723  |
|                           | Control day 14            | 335.00000*  | 40.03363 | .000  | 194.7277  | 475.2723  |
|                           | PCL Scaffold day 14       | 303.66667*  | 40.03363 | .000  | 163.3944  | 443.9390  |
|                           | PCL/AgNPs Scaffold day 14 | 190.00000*  | 40.03363 | .004  | 49.7277   | 330.2723  |
|                           | Control day 21            | 250.00000*  | 40.03363 | .000  | 109.7277  | 390.2723  |
|                           | PCL Scaffold day 21       | 190.33333*  | 40.03363 | .004  | 50.0610   | 330.6056  |
| PCL/AgNPs Scaffold day 21 | Control day 7             | 383.33333*  | 40.03363 | .000  | 243.0610  | 523.6056  |
|                           | PCL Scaffold day 7        | 549.66667*  | 40.03363 | .000  | 409.3944  | 689.9390  |
|                           | PCL/AgNPs Scaffold day 7  | 387.00000*  | 40.03363 | .000  | 246.7277  | 527.2723  |
|                           | Control day 14            | 335.00000*  | 40.03363 | .000  | 194.7277  | 475.2723  |
| PCL Scaffold day 21       | PCL Scaffold day 14       | 303.66667*  | 40.03363 | .000  | 163.3944  | 443.9390  |
|                           | PCL/AgNPs Scaffold day 14 | 190.00000*  | 40.03363 | .004  | 49.7277   | 330.2723  |
|                           | Control day 21            | 250.00000*  | 40.03363 | .000  | 109.7277  | 390.2723  |
|                           | PCL Scaffold day 21       | 190.33333*  | 40.03363 | .004  | 50.0610   | 330.6056  |

\*. The mean difference is significant at the 0.05 level.

The significance value (p-value) is smaller than the  $\alpha$  (0.05), meaning that ALP activity in hWJ-MSCs grown on PCL/AgNPs scaffold was significantly higher than ALP activity in hWJ-MSCs grown on PCL scaffold.
